# Supplementary material for: Using Multiple Microenvironments to Find Similar Ligand-Binding Sites: Application to Kinase Inhibitor Binding
Source: PLOS journal article supplement (doi:10.1371/journal.pcbi.1002326), 2011-12-29
Supplement: S5 (10.1371/journal.pcbi.1002326.s005) [file journal.pcbi.1002326.s005]

Table S1. Highly ranked off-target predictions

We applied PocketFEATURE to predicted off-targets for CETP inhibitors (specifically Torcetrapib) from a non-redundant subset of PDB for 1200 human proteins. Most of PocketFEATURE predictions are involved in lipid transfer or binding and signal transduction pathway. One group published a panel of 20 off-targets for Torcetrapib predicted by SOIPPA. SOIPPA predictions have been refined and validated by docking methods and critical human curation. Between the 20 SOIPPA off-targets by SOIPPA and the 34 PocketFEATURE predictions, seven are the same (highlight in grey). The hypergeometric *p-value* for enrichment is 1e-4.

| PDB  | Chain | Ligand ID | Protein name                                               |
|------|-------|-----------|------------------------------------------------------------|
| 1kkq | A     | 471       | peroxisome proliferator activated receptor                 |
| 1y0s | A     | 331       | peroxisome proliferator activated receptor delta           |
| 2p54 | A     | 735       | peroxisome proliferator-activated receptor alpha           |
| 2a1l | A     | PCW       | phosphatidylinositol transfer protein beta isoform         |
| 3cqy | A     | HEM       | nuclear receptors REV-ERB alpha                            |
| 1yuc | B     | EPH       | orphan nuclear receptor nr5a2                              |
| 1nrl | B     | SRL       | orphan nuclear receptor pxr                                |
| 1yow | A     | P0E       | steroidogenic factor 1                                     |
| 1lqv | B     | PTY       | endothelial protein c receptor                             |
| 1nhz | A     | 486       | glucocorticoid receptor                                    |
| 2oo8 | X     | RAJ       | angiopoietin-1 receptor                                    |
| 1dkf | B     | BMS       | retinoic acid receptor-alpha                               |
| 1onq | A     | SLF       | t-cell surface glycoprotein cd1a                           |
| 1gzp | A     | GM2       | t-cell surface glycoprotein cd1b                           |
| 3huj | A     | AGH       | t-cell surface glycoprotein cd1d                           |
| 1jnk | A     | ANP       | c-jun n-terminal kinase                                    |
| 3eqc | A     | AGS       | dual specificity mitogen-activated protein kinase kinase 1 |
| 3gp0 | A     | NIL       | mitogen-activated protein kinase 11                        |
| 2clq | B     | STU       | mitogen-activated protein kinase kinase kinase 5           |
| 3efw | A     | AK8       | serine/threonine-protein kinase 6                          |
| 3fxz | A     | FLL       | serine/threonine-protein kinase PAK1                       |
| 1tbf | A     | VIA       | cgmp-specific 3',5'-cyclic phosphodiesterase               |
| 3bjc | A     | WAN       | cgmp-specific 3',5'-cyclic phosphodiesterase               |
| 1uu3 | A     | LY4       | 3-phosphoinositide dependent protein kinase-1              |
| 2bzb | A     | SAH       | thiopurine s-methyltransferase                             |
| 3cck | A     | SAM       | trna (guanine-n(7)-)-methyltransferase                     |
| 2ozu | A     | ACO       | histone acetyltransferase myst3                            |
| 2p0w | A     | ACO       | histone acetyltransferase type b catalytic subunit         |
| 1k3y | A     | GTX       | glutathione s-transferase A1                               |
| 2vcv | I     | ASD       | glutathione s-transferase A3                               |
| 1ewf | A     | PC1       | bactericidal/permeability-increasing protein               |
| 2ag4 | A     | LP3       | ganglioside gm2 activator                                  |
| 2cvd | D     | HQL       | glutathione-requiring prostaglandin d synthase             |
| 3kh6 | A     | APR       | polymerase 15                                              |
| 1r5l | A     | VIV       | alpha-tocopherol transfer protein                          |
| 1qip | B     | GNB       | lactoylglutathione lyase                                   |
